# Supplementary material
Source: PubMed Central journal article supplement (PMC5623168)

**Figure E1**

**A. Peripheral Blood**

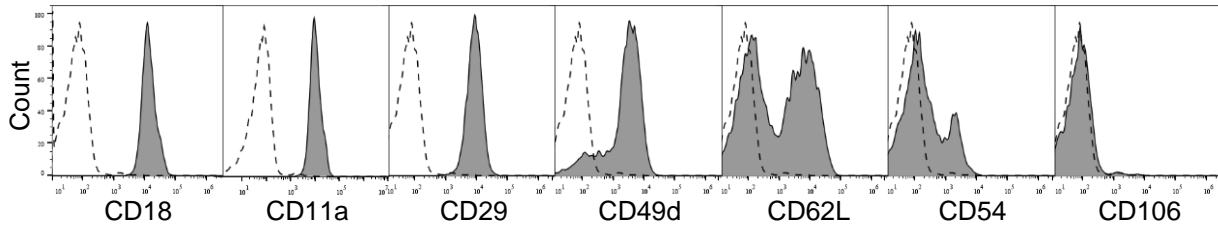

**B. Lung**

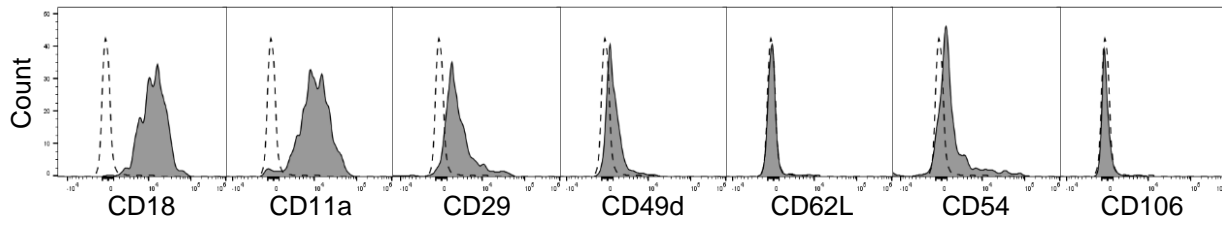

**C. Lung Lymph Nodes**

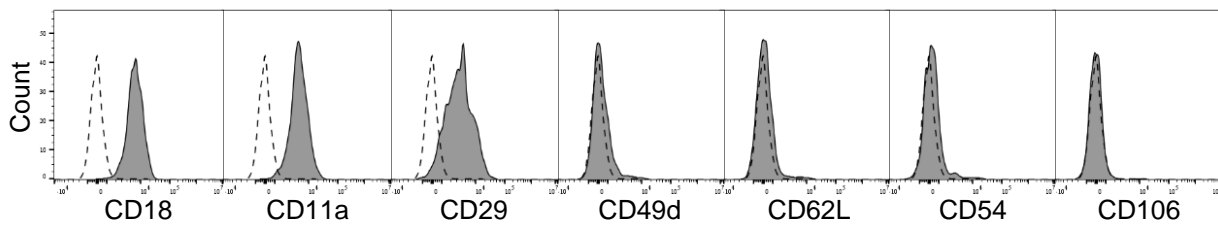

□ Isotype control

■ Adhesion molecule

| CD nomenclature: | Alternative name:   |
|------------------|---------------------|
| CD18             | Integrin $\beta_2$  |
| CD11a            | Integrin $\alpha_L$ |
| CD29             | Integrin $\beta_1$  |
| CD49d            | Integrin $\alpha_4$ |
| CD62L            | L-selectin          |
| CD54             | ICAM-1              |
| CD106            | VCAM-1              |

**Figure E2**

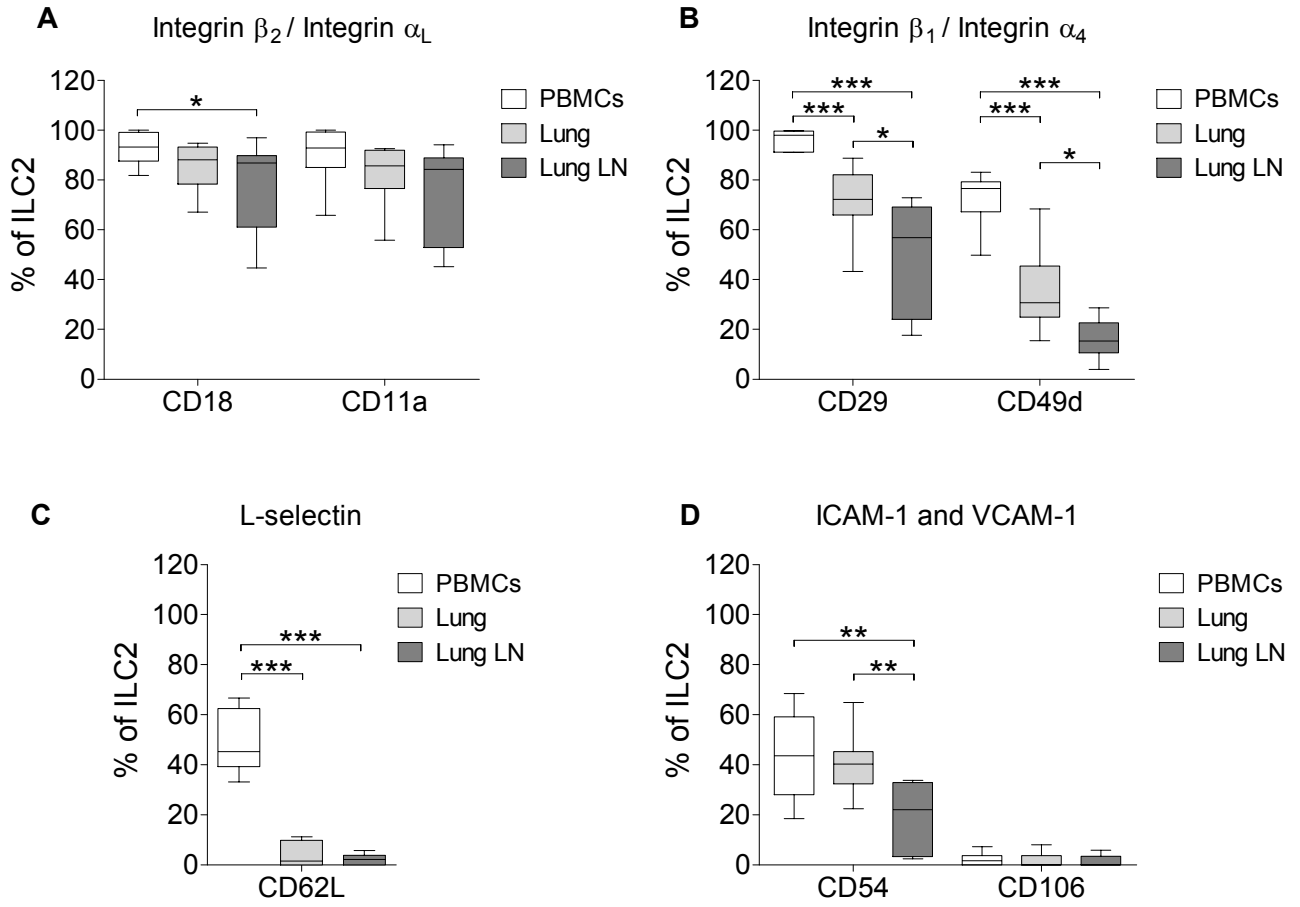

### Figure E3

#### A. ILC2

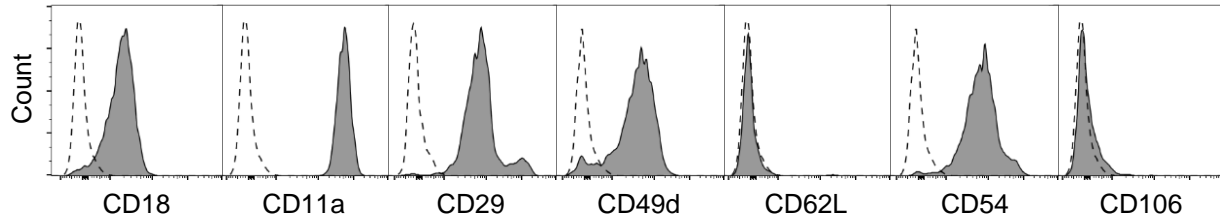

#### B. CD4<sup>+</sup>Thy1.2<sup>+</sup> cells

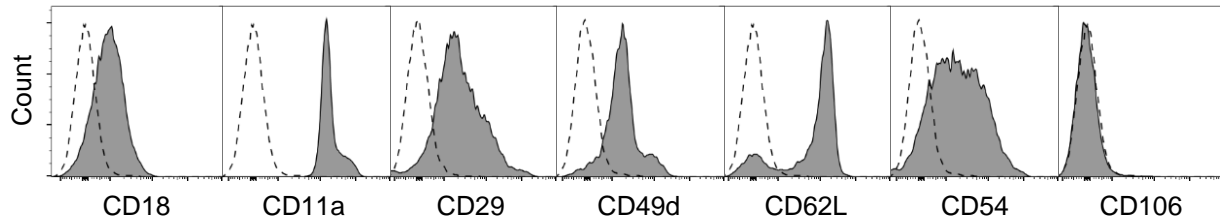

□ Isotype control      ■ Adhesion molecule

| <u>CD nomenclature:</u> | <u>Alternative name:</u> |
|-------------------------|--------------------------|
| CD18                    | Integrin $\beta_2$       |
| CD11a                   | Integrin $\alpha_L$      |
| CD29                    | Integrin $\beta_1$       |
| CD49d                   | Integrin $\alpha_4$      |
| CD62L                   | L-selectin               |
| CD54                    | ICAM-1                   |
| CD106                   | VCAM-1                   |

**Figure E4**

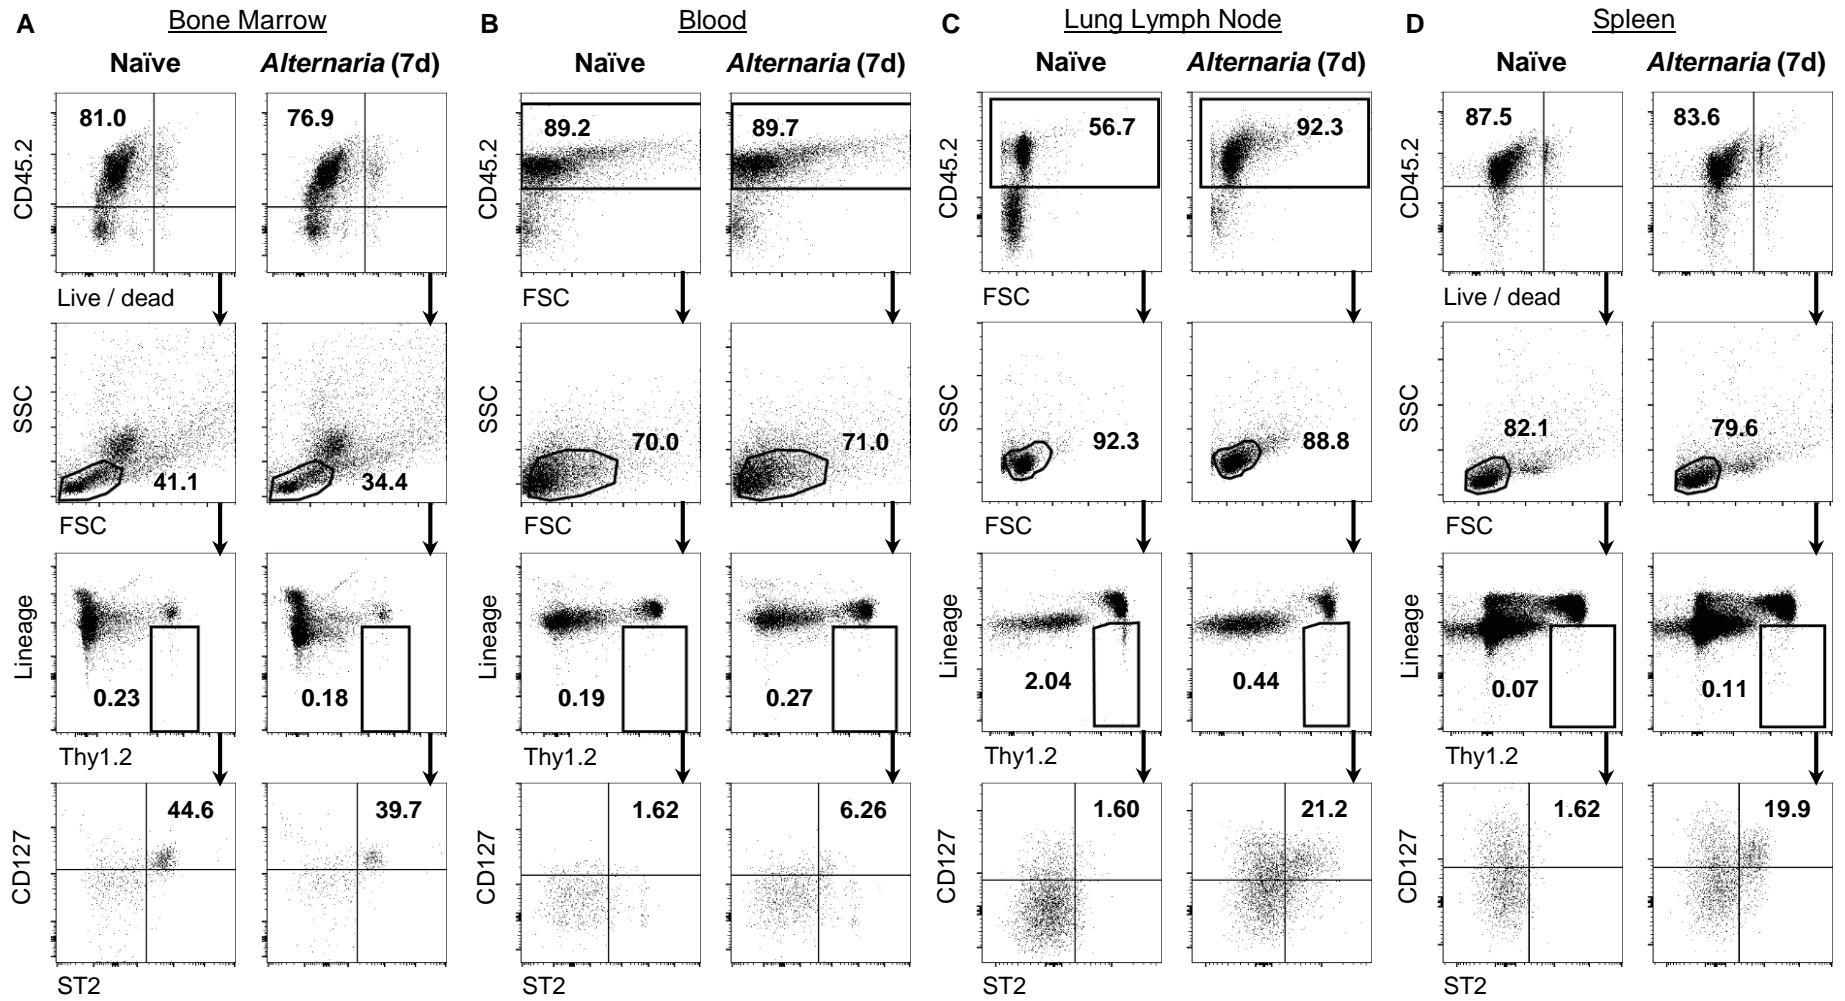

**Figure E5**

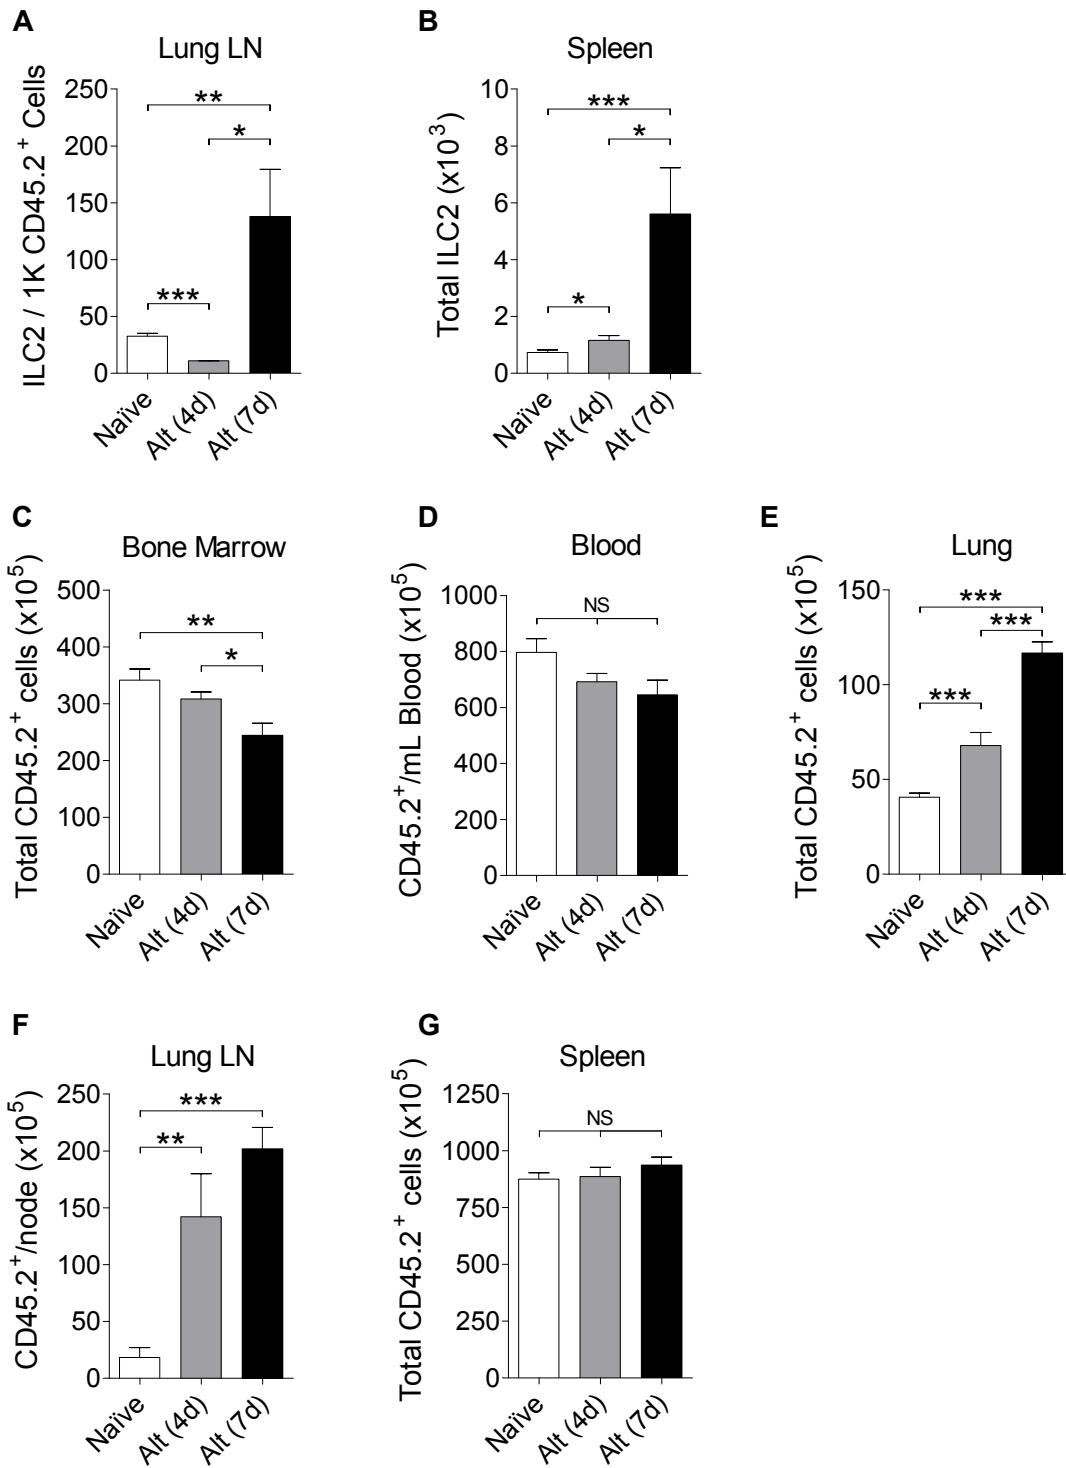

## Figure E6

### A Naïve CD45.1 BMT mouse lung

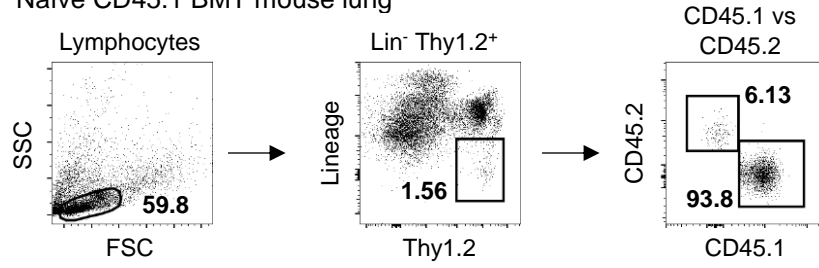

### B *Alternaria* challenged CD45.1 BMT mouse lung

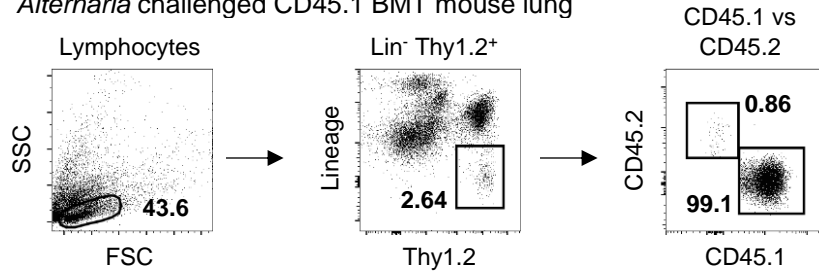

### C Naïve CD45.2 BMT mouse lung

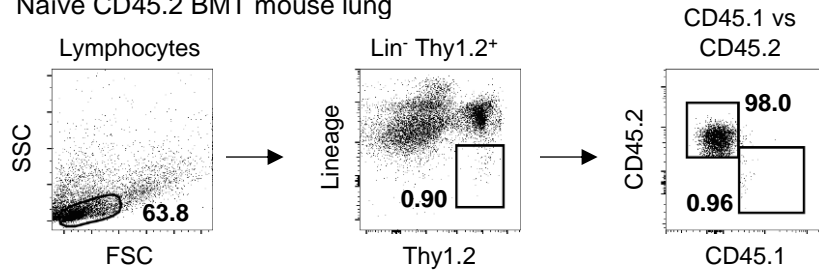

### D

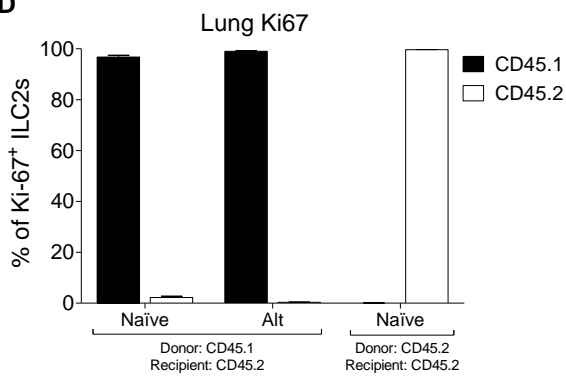

Figure E7

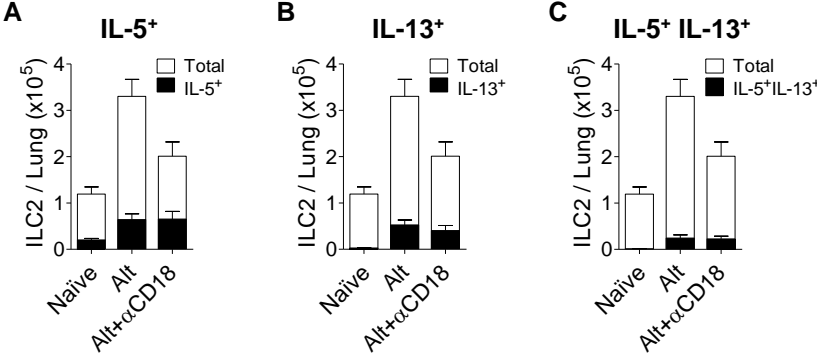

Supplement: NIHMS864256-supplement-supplement_1.pdf [file NIHMS864256-supplement-supplement_1.pdf]
