# Supplementary material
Source: PubMed Central journal article supplement (PMC5623168)
Supplement: NIHMS864256-supplement-1.pdf [file NIHMS864256-supplement-1.pdf]

268 **Table EI. List of anti-human antibodies used in this study.**

| <b>Antibody</b>              | <b>Clone</b> | <b>Use</b>     | <b>Source</b>   |
|------------------------------|--------------|----------------|-----------------|
| Human:                       |              |                |                 |
| Anti-human lineage cocktail  | ---          | Flow cytometry | BD Biosciences  |
| Anti-human CD4               | OKT4/SK3     | Flow cytometry | eBioscience     |
| Anti-human CD235a            | HIR2         | Flow cytometry | eBioscience     |
| Anti-human FcεR1             | AER-37       | Flow cytometry | eBioscience     |
| Anti-human CD11b             | ICRF44       | Flow cytometry | eBioscience     |
| Anti-human γδTCR             | B1.1         | Flow cytometry | eBioscience     |
| Anti-human CD45              | HI30         | Flow cytometry | eBioscience     |
| Anti-human CRTH2             | BM16         | Flow cytometry | Miltenyi Biotec |
| Anti-human CRTH2             | BM16         | Flow cytometry | BioLegend       |
| Anti-human CD11a             | HI111        | Flow cytometry | BioLegend       |
| Anti-human CD18              | TS1/18       | Flow cytometry | BioLegend       |
| Anti-human CD29              | TS2/16       | Flow cytometry | eBioscience     |
| Anti-human CD49d             | 9F10         | Flow cytometry | BioLegend       |
| Anti-human CD54              | HA58         | Flow cytometry | eBioscience     |
| Anti-human CD62L             | DREG56       | Flow cytometry | eBioscience     |
| Anti-human CD106             | STA          | Flow cytometry | BioLegend       |
| Anti-human/mouse integrin β7 | FIB27        | Flow cytometry | BioLegend       |

269
