# Supplementary material
Source: PubMed Central journal article supplement (PMC5623168)
Supplement: NIHMS864256-supplement-2.pdf [file NIHMS864256-supplement-2.pdf]

270 **Table EII. List of anti-mouse antibodies used in this study.**

| <b>Antibody</b>              | <b>Clone</b>  | <b>Use</b>              | <b>Source</b>  |
|------------------------------|---------------|-------------------------|----------------|
| Mouse:                       |               |                         |                |
| Anti-mouse CD18              | M18/2         | <i>In vivo</i> blocking | eBioscience    |
| Rat IgG2a K isotype          | eBR2a         | Control for anti-CD18   | eBioscience    |
| Anti-mouse CD29              | HMb1-1        | <i>In vivo</i> blocking | eBioscience    |
| Armenian hamster IgG isotype | eBio299Arm    | Control for anti-CD29   | eBioscience    |
| Anti-mouse CD49d             | R1-2          | <i>In vivo</i> blocking | eBioscience    |
| Rat IgG2b K isotype          | eB149/10H5    | Control for anti-CD49d  | eBioscience    |
| Anti-mouse CD11a             | M17/4         | <i>In vivo</i> blocking | BioLegend      |
| Rat IgG2a K isotype          | RTK2758       | Control for anti-CD11a  | BioLegend      |
| Anti-mouse CD16/32           | 93            | Flow cytometry          | BioLegend      |
| Anti-mouse lineage cocktail  | ---           | Flow cytometry          | BioLegend      |
| Anti-mouse CD5               | 53-7.3        | Flow cytometry          | BD Biosciences |
| Anti-mouse CD11c             | N418          | Flow cytometry          | BioLegend      |
| Anti-mouse FcεR1α            | MAR-1         | Flow cytometry          | BioLegend      |
| Anti-mouse NK 1.1            | PK136         | Flow cytometry          | BioLegend      |
| Anti-mouse TCRβ              | H57-597       | Flow cytometry          | BioLegend      |
| Anti-mouse TCRγδ             | GL3           | Flow cytometry          | BioLegend      |
| Anti-mouse CD4               | RM4-5         | Flow cytometry          | eBioscience    |
| Anti-mouse CD45.2            | 104           | Flow cytometry          | eBioscience    |
| Anti-mouse CD45.1            | A20           | Flow cytometry          | BioLegend      |
| Anti-mouse Thy 1.2           | 53-2.1/30-H12 | Flow cytometry          | eBioscience    |
| Anti-mouse CD11a             | M17/4         | Flow cytometry          | BioLegend      |
| Anti-mouse CD18              | M18/2         | Flow cytometry          | eBioscience    |
| Anti-mouse CD29              | HMb1-1        | Flow cytometry          | eBioscience    |
| Anti-mouse CD49d             | R1-2          | Flow cytometry          | eBioscience    |
| Anti-mouse CD54              | YN1/1.7.4     | Flow cytometry          | BioLegend      |
| Anti-mouse CD62L             | MEL-14        | Flow cytometry          | eBioscience    |
| Anti-mouse CD106             | 429           | Flow cytometry          | eBioscience    |
| Anti-human/mouse integrin β7 | FIB27         | Flow cytometry          | BioLegend      |
| Anti-mouse ST2               | DIH9          | Flow cytometry          | BioLegend      |
| Anti-mouse CD127             | A7R34         | Flow cytometry          | BioLegend      |

271
